# Supplementary material for: Constructing a novel super-crosslinked triazine COF through molecular expansion for enhanced photocatalytic performance under visible light
Source: Royal Society of Chemistry journal article supplement (doi:10.1039/d4en00176a), 2024-01-01
Supplement: d4en00176a1.pdf [file d4en00176a1.pdf]

## Constructing a novel super-crosslinked triazine COFs through molecular expansion for enhanced photocatalytic performance under visible light

Yuxuan Shao,<sup>a</sup> Dan You,<sup>a</sup> Yuqi Wan,<sup>b\*</sup> Zhiquan Pan<sup>a</sup> and Qingrong Cheng<sup>a\*</sup>

<sup>a</sup> Engineering Research Center of Phosphorous Development and Utilization of Ministry of Education, Wuhan Institute of Technology, Wuhan, 430205, PR China.

<sup>b</sup> The Department of Electrical and Electronic Engineering, The University of Hong Kong, Hong Kong, 999077, PR China.

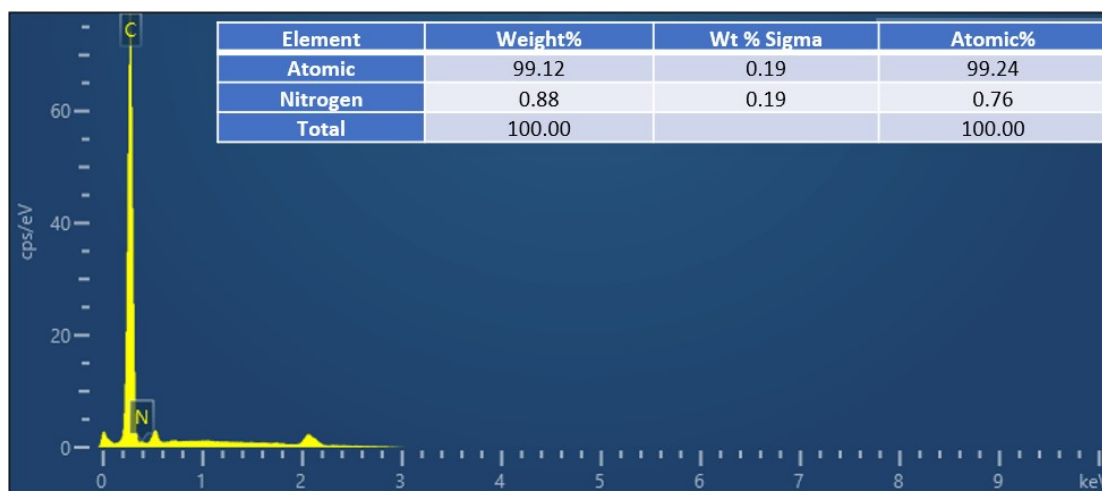

Fig.S1 EDX mapping of HCTF-2.

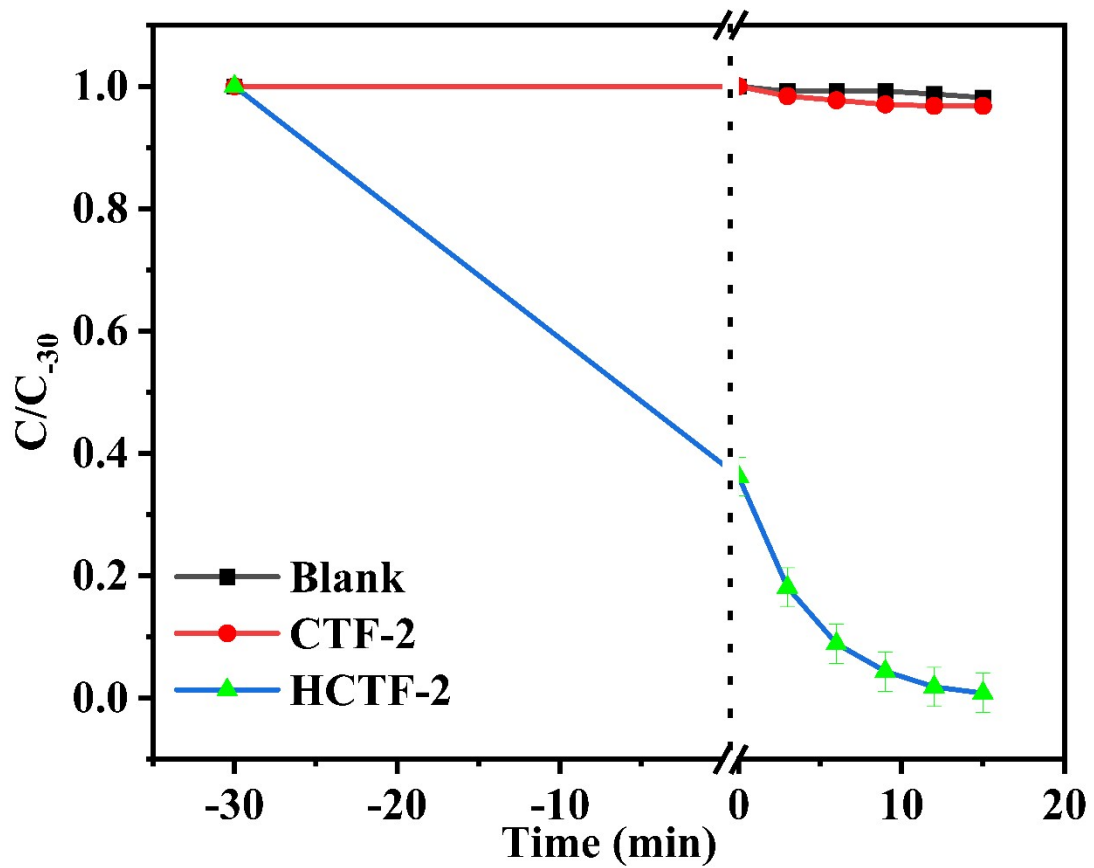

Fig.S2 The degradation curves of RhB by CTF-2 and HCTF-2;

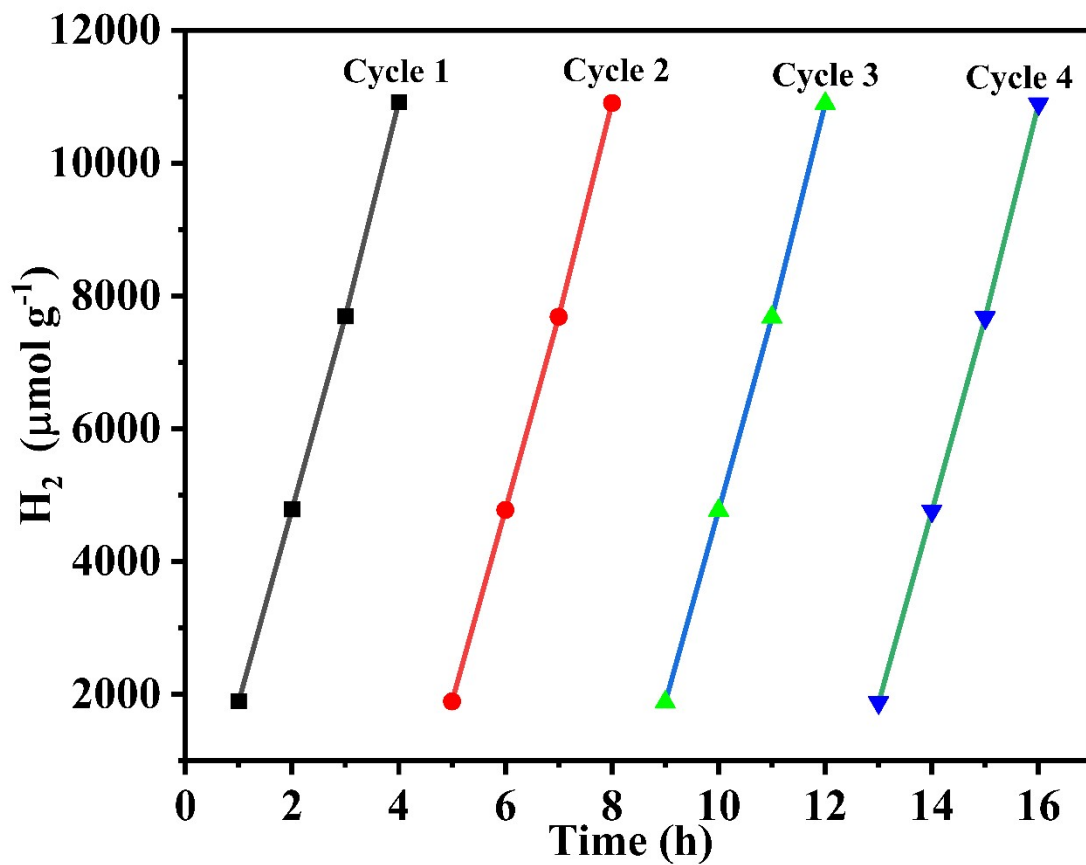

Fig.S3 Four-cycle photocatalytic hydrogen production image of HCTF-2

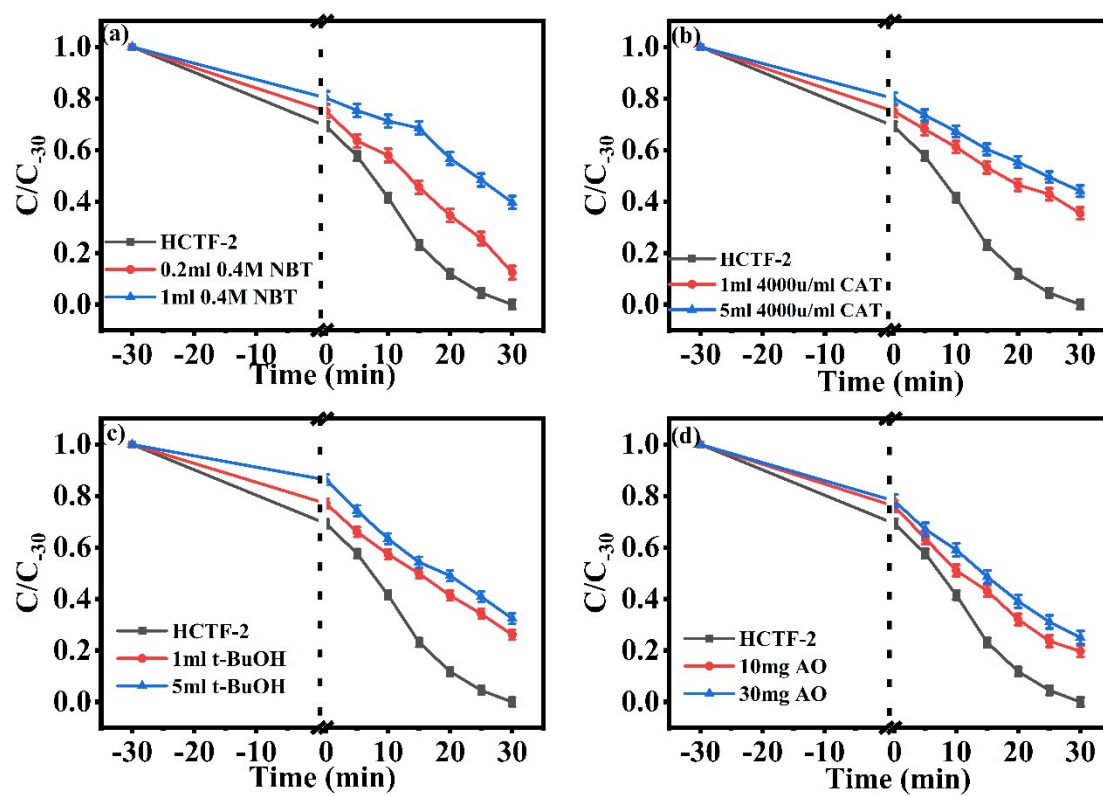

Fig.S4 (a-d) the effects of different dosages of trapping agents on the photodegradation of LEF by HCTF-2

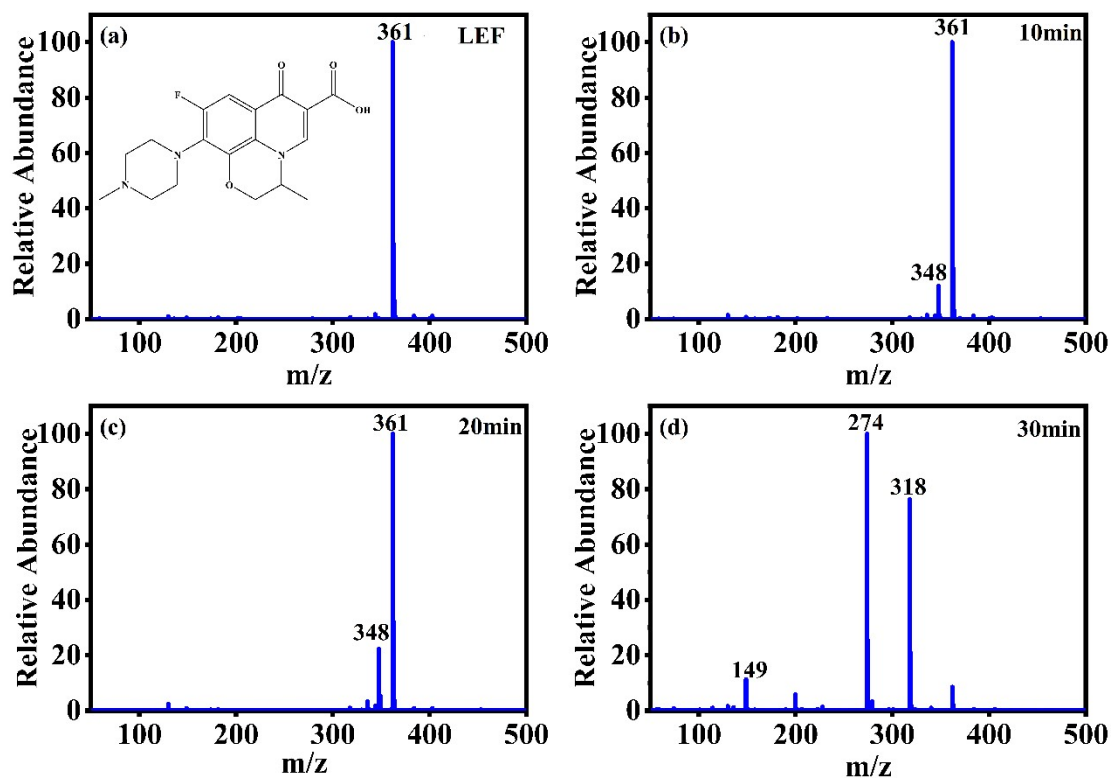

Fig.S5 Variations in the relative intensity of intermediate products of LEF with different reaction time, as obtained in the LC-MS spectra.

Table.S1 Comparison of HCTF-2 for photocatalytic TC degradation.

| Catalyst / mg | $V$ (mL) /<br>$C_{-30}$<br>( $\text{mg}\cdot\text{L}^{-1}$ ) | Light source  | Time (min) | Result (%) | TOF   | Ref       |
|---------------|--------------------------------------------------------------|---------------|------------|------------|-------|-----------|
| HCTF-2/10     | 50/20                                                        | Visible light | 21         | 99.0       | 4.714 | This work |
| TpMa/5        | 20/20                                                        | Visible light | 70         | 19.7       | 0.225 | [1]       |
| COF-Ph/10     | 50/20                                                        | Visible light | 90         | 29.0       | 0.322 | [2]       |
| TpPa-1/10     | 20/80                                                        | Sun light     | 40         | 70.0       | 2.800 | [3]       |

$$TOF = \frac{C_{-30} \times V_{TC} \times \text{Degradation rate}}{m_{\text{photocatalyst}} \times t}$$

**Table.S2** Comparison of HCTF-2 for photocatalytic H<sub>2</sub> evolution.

| <i>Photocatalysts/mg</i> | <i>Light source</i> | <i>H<sub>2</sub></i>                                               | <i>Ref</i> |
|--------------------------|---------------------|--------------------------------------------------------------------|------------|
|                          |                     | <i>generation rate</i><br><i>μmol·g<sup>-1</sup>h<sup>-1</sup></i> |            |
| HCTF-2/30                | Visible light       | 2728.61                                                            | This work  |
| TpPa-1/40                | Visible light       | 137.00                                                             | [4]        |
| TpBD/25                  | Visible light       | 141.00                                                             | [5]        |
| TpPa-2/10                | Visible light       | 2200.00                                                            | [6]        |
| TFPT-COF/10              | Ultraviolet light   | 230.00                                                             | [7]        |

## References

- [1] Y. Cong, X. Chen, W. Wang, S.-W. Lv, CdS nanoparticle decorated triazine-based COFs with enhanced photocatalytic activity for highly effective degradation of emerging contaminants, *New Journal of Chemistry*, 45 (2021) 21278-21284.
- [2] B. Dong, Y. Wan, Q. Cheng, H. Zhou, Z. Pan, Construction of novel MoS<sub>2</sub>@COF-Ph heterojunction photocatalysts for boosted photocatalytic efficiency and hydrogen production performance under sunlight, *Environmental Science: Nano*, 9 (2022) 2799-2814.
- [3] X. Guo, D. Yin, K.K. Khaing, J. Wang, Z. Luo, Y. Zhang, Construction of MOF/COF Hybrids for Boosting Sunlight-Induced Fenton-like Photocatalytic Removal of Organic Pollutants, *Inorg Chem*, 60 (2021) 15557-15568.
- [4] P. Dong, T. Cheng, J.-l. Zhang, J. Jiang, L. Zhang, X. Xi, J. Zhang, Fabrication of an Organic/Inorganic Hybrid TpPa-1-COF/ZnIn<sub>2</sub>S<sub>4</sub> S-Scheme Heterojunction for Boosted Photocatalytic Hydrogen Production, *ACS Applied Energy Materials*, 6 (2023) 1103-1115.
- [5] S. Bao, Q. Tan, S. Wang, J. Guo, K. Lv, S.A.C. Carabineiro, L. Wen, TpBD COF@ZnIn<sub>2</sub>S<sub>4</sub> nanosheets: A novel S-scheme heterojunction with enhanced photoreactivity for hydrogen production, *Applied Catalysis B: Environmental*, 330 (2023).
- [6] J. Ren, Z. Xia, B. Luo, D. Li, W. Shi, Fabrication of 2D/2D COF/SnNb<sub>2</sub>O<sub>6</sub> nanosheets and their enhanced solar hydrogen production, *Inorganic Chemistry Frontiers*, 8 (2021) 1686-1694.
- [7] L. Stegbauer, K. Schwinghammer, B.V. Lotsch, A hydrazone-based covalent organic framework for photocatalytic hydrogen production, *Chem. Sci.*, 5 (2014) 2789-2793.
